# Supplementary figures and images for: Three Licorice Extracts’ Impact on the Quality of Fresh-Cut Sweet Potato (Ipomoea batatas (L.) Lam) Slices
Source: MDPI journal article supplement (doi:10.3390/foods13020211), 2024-01-09

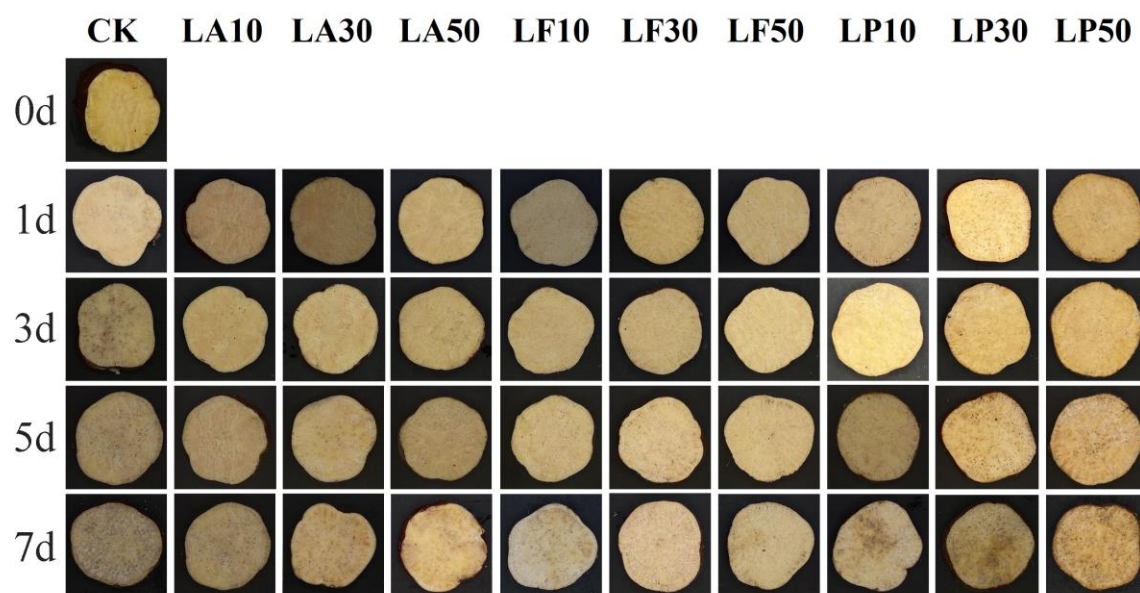

**Figure S1.** FCSPSs by different licorice extract solution treatments.

Supplement: s1 [file s1]
